# Supplementary material for: Factors affecting the magnetic coupling in Sr2V3O9 type oxides: As for V substitution in the VO4 tetrahedra and nature of the cation
Source: Royal Society of Chemistry journal article supplement (doi:10.1039/c3dt51999f), 2013-01-01
Supplement: c3dt51999f.pdf [file c3dt51999f.pdf]

## Supplementary Information

for

**Factors affecting the magnetic coupling in  $\text{Sr}_2\text{V}_3\text{O}_9$  type oxides: As for V substitution in the  $\text{VO}_4$  tetrahedra and nature of the cation**

by

**Antonio Rodríguez-Forteza, Miquel Llunell, Pere Alemany and Enric Canadell**

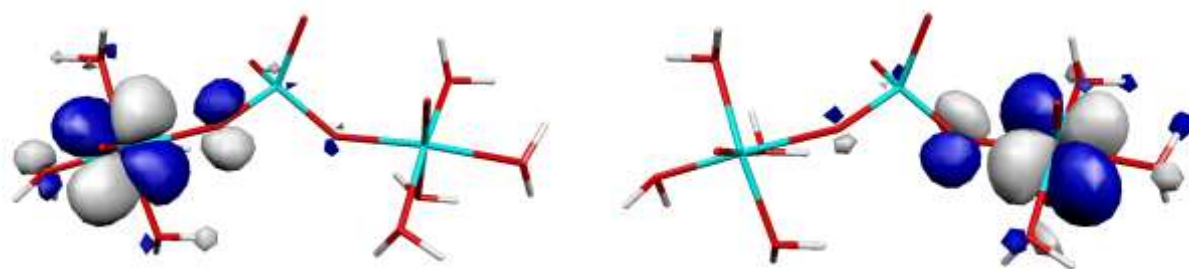

$\text{Sr}_2\text{V}_3\text{O}_9$

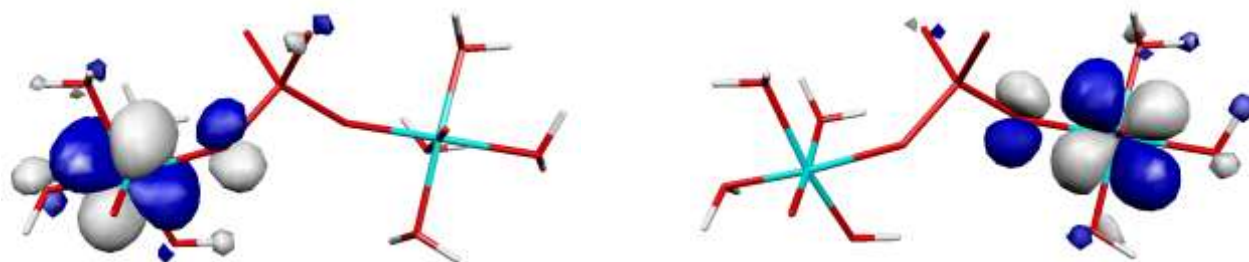

$\text{Pb}_2\text{As}_2\text{VO}_9$

**Figure S1.** Natural magnetic orbitals for the molecular models of  $\text{Sr}_2\text{V}_3\text{O}_9$  (top) and  $\text{Pb}_2\text{As}_2\text{VO}_9$  (bottom).
